# Supplementary material
Source: ML conference proceedings conference paper supplement (https://proceedings.mlr.press/v80/oliva18a.html)
Supplement: Supplementary file [file oliva18a-supp.pdf]

## A. Appendix

Below we detail the results on several datasets using different combinations of transformations and autoregressive conditional models. Each additive coupling transformation uses a fully connected network with two hidden layers of 256 units. RNN transformations use a hidden state with 16 units. SingleInd conditional models modeled each dimension’s conditional as a standard Gaussian. MultiInd modeled each dimension’s conditional as independent mixtures with 40 components (each with mean, scale, and weight parameter). RAM, LAM, and Tied conditional models each had a hidden state with 120 units that was fed through two fully connected layers each with 120 units to produce the parameters of the mixtures with 40 components. The RAM hidden state was produced by a GRU with 256 units. LAM and Tied hidden states came through a linear map as discussed above.

Table 2. Held out test log-likelihoods for the Markovian dataset. The superscripts denote rankings of log-likelihoods on the validation dataset. Note that NADE is TIED conditional with None Transform and NICE is Add+Re Transformation with SingleInd Conditional. In parenthesis is the top-10 picks using validation set.

| Transformation  | LAM                         | RAM                         | TIED   | MultiInd                     | SingleInd |
|-----------------|-----------------------------|-----------------------------|--------|------------------------------|-----------|
| None            | 14.319                      | -29.950                     | -0.612 | -41.472                      | ---       |
| L None          | <b>15.486<sup>(9)</sup></b> | 14.538                      | 10.906 | 5.252                        | -9.426    |
| RNN             | 14.777                      | -37.716                     | 11.075 | -30.491                      | -37.038   |
| L RNN           | <b>15.658<sup>(5)</sup></b> | 10.354                      | 10.910 | 5.370                        | 3.310     |
| 2xRNN           | 14.683                      | 13.698                      | 11.493 | -18.448                      | -34.268   |
| L 2xRNN         | <b>15.474<sup>(8)</sup></b> | <b>15.752<sup>(3)</sup></b> | 12.316 | 5.385                        | 3.739     |
| 4xAdd+Re        | 15.269                      | 12.257                      | 12.912 | 12.446                       | 11.625    |
| L 4xAdd+Re      | <b>15.683<sup>(6)</sup></b> | 12.594                      | 13.845 | 12.768                       | 12.069    |
| 4xSRNN+Re       | 14.829                      | 14.381                      | 11.798 | 11.738                       | 12.932    |
| L 4xSRNN+Re     | 15.289                      | <b>16.202<sup>(1)</sup></b> | 12.748 | <b>15.415<sup>(10)</sup></b> | 13.908    |
| RNN+4xAdd+Re    | 15.171                      | 12.991                      | 14.455 | 11.467                       | 10.382    |
| L RNN+4xAdd+Re  | 15.078                      | 12.655                      | 14.415 | 12.886                       | 12.315    |
| RNN+4xSRNN+Re   | 14.968                      | <b>16.216<sup>(2)</sup></b> | 12.590 | <b>15.589<sup>(4)</sup></b>  | 14.231    |
| L RNN+4xSRNN+Re | 15.429                      | <b>15.566<sup>(7)</sup></b> | 14.179 | 14.528                       | 13.961    |

Table 3. Held out test log-likelihoods for star 32d dataset. The superscript denotes ranking of log-likelihood on cross validation dataset. Note that NADE is TIED conditional with None Transform and NICE is Add+Re Transformation with SingleInd Conditional. In parenthesis is the top-10 picks using validation set.

| Transformation  | LAM                         | RAM                         | TIED    | MultiInd | SingleInd |
|-----------------|-----------------------------|-----------------------------|---------|----------|-----------|
| None            | -2.041                      | 2.554                       | -10.454 | -29.485  | ---       |
| L None          | 5.454                       | 8.247                       | -7.858  | -26.988  | -38.952   |
| RNN             | -1.276                      | 2.762                       | -6.292  | -25.946  | -41.275   |
| L RNN           | 7.775                       | 6.335                       | -1.157  | -25.986  | -34.408   |
| 2xRNN           | 3.705                       | 8.032                       | -0.565  | -25.100  | -38.490   |
| L 2xRNN         | <b>14.878<sup>(3)</sup></b> | 9.946                       | 0.901   | -23.772  | -33.075   |
| 4xAdd+Re        | <b>13.278<sup>(6)</sup></b> | <b>11.561<sup>(9)</sup></b> | 7.146   | -16.740  | -21.332   |
| L 4xAdd+Re      | <b>15.728<sup>(2)</sup></b> | <b>12.444<sup>(7)</sup></b> | 9.031   | -6.091   | -11.225   |
| 4xSRNN+Re       | 3.496                       | 8.429                       | -1.380  | -15.590  | -23.712   |
| L 4xSRNN+Re     | <b>16.042<sup>(1)</sup></b> | <b>9.939<sup>(10)</sup></b> | 5.598   | -12.530  | -16.889   |
| RNN+4xAdd+Re    | <b>14.071<sup>(5)</sup></b> | <b>14.123<sup>(4)</sup></b> | 6.868   | -14.773  | -20.483   |
| L RNN+4xAdd+Re  | <b>11.819<sup>(8)</sup></b> | 9.253                       | 2.638   | -7.662   | -14.530   |
| RNN+4xSRNN+Re   | -0.679                      | 3.320                       | -6.172  | -12.879  | -19.204   |
| L RNN+4xSRNN+Re | 7.433                       | 7.324                       | 3.554   | -10.427  | -15.243   |

Table 4. Held out test log-likelihood for Star 128d dataset. The superscript denotes ranking of log-likelihood on crossvalidation dataset. Note that NADE is TIED conditional with None Transform and NICE is Add+Re Transformation with SingleInd Conditional. In parenthesis is the top-10 picks using validation set.

| Transformation  | LAM                         | RAM                          | TIED    | MultiInd | SingleInd |
|-----------------|-----------------------------|------------------------------|---------|----------|-----------|
| None            | 15.671                      | 15.895                       | -83.115 | -128.238 | ---       |
| L None          | 57.881                      | -82.100                      | -28.206 | -123.939 | -159.391  |
| RNN             | 18.766                      | 48.295                       | -22.485 | -113.181 | -178.641  |
| L RNN           | <b>66.070<sup>(9)</sup></b> | -49.084                      | 31.136  | -107.083 | -155.324  |
| 2xRNN           | 27.295                      | 45.834                       | -11.930 | -113.210 | -178.331  |
| L 2xRNN         | <b>85.681<sup>(3)</sup></b> | -84.524                      | 30.974  | -105.368 | -162.635  |
| 4xAdd+Re        | <b>77.195<sup>(6)</sup></b> | <b>61.947<sup>(10)</sup></b> | 16.062  | -75.206  | -111.542  |
| L 4xAdd+Re      | <b>88.837<sup>(1)</sup></b> | -21.882                      | 20.234  | -65.694  | -96.071   |
| 4xSRNN+Re       | 33.577                      | -98.796                      | 3.256   | -88.912  | -98.936   |
| L 4xSRNN+Re     | <b>86.375<sup>(2)</sup></b> | <b>76.968<sup>(5)</sup></b>  | 33.481  | -85.590  | -93.086   |
| RNN+4xAdd+Re    | <b>66.540<sup>(8)</sup></b> | -57.861                      | -16.277 | -75.491  | -114.729  |
| L RNN+4xAdd+Re  | <b>80.063<sup>(4)</sup></b> | 32.104                       | 21.944  | -71.933  | -100.384  |
| RNN+4xSRNN+Re   | 21.719                      | -87.335                      | -6.517  | -76.459  | -85.422   |
| L RNN+4xSRNN+Re | <b>72.463<sup>(7)</sup></b> | 56.201                       | 26.269  | -71.843  | -91.695   |

Table 5. Average performance percentage score for each model across all datasets. Note that this measure is not over a logarithmic space.

| Transformation  | LAM   | RAM          | TIED  | MultiInd | SingleInd | MAX   |
|-----------------|-------|--------------|-------|----------|-----------|-------|
| None            | 0.218 | 0.118        | 0.006 | 0.000    | 0.000     | 0.218 |
| L None          | 0.154 | 0.179        | 0.026 | 0.051    | 0.001     | 0.179 |
| RNN             | 0.086 | 0.158        | 0.014 | 0.001    | 0.000     | 0.158 |
| L RNN           | 0.173 | <b>0.540</b> | 0.014 | 0.040    | 0.013     | 0.540 |
| 2xRNN           | 0.151 | 0.101        | 0.045 | 0.001    | 0.000     | 0.151 |
| L 2xRNN         | 0.118 | 0.330        | 0.015 | 0.045    | 0.025     | 0.330 |
| 4xAdd+Re        | 0.036 | 0.047        | 0.015 | 0.010    | 0.006     | 0.047 |
| L 4xAdd+Re      | 0.153 | 0.096        | 0.025 | 0.014    | 0.009     | 0.153 |
| 4xSRNN+Re       | 0.086 | 0.051        | 0.031 | 0.010    | 0.008     | 0.086 |
| L 4xSRNN+Re     | 0.109 | 0.143        | 0.023 | 0.021    | 0.018     | 0.143 |
| RNN+4xAdd+Re    | 0.121 | 0.096        | 0.023 | 0.011    | 0.011     | 0.121 |
| L RNN+4xAdd+Re  | 0.336 | 0.165        | 0.024 | 0.016    | 0.013     | 0.336 |
| RNN+4xSRNN+Re   | 0.102 | 0.151        | 0.017 | 0.012    | 0.014     | 0.151 |
| L RNN+4xSRNN+Re | 0.211 | 0.288        | 0.024 | 0.018    | 0.016     | 0.288 |
| MAX             | 0.336 | 0.540        | 0.045 | 0.051    | 0.025     |       |

Table 6. Held out test log-likelihood for forest dataset. The superscript denotes ranking of log-likelihood on crossvalidation dataset. Note that NADE is TIED conditional with None Transform and NICE is Add+Re Transformation with SingleInd Conditional. In parenthesis is the top-10 picks using validation set.

| Transformation  | LAM                        | RAM                         | TIED   | MultiInd | SingleInd |
|-----------------|----------------------------|-----------------------------|--------|----------|-----------|
| None            | 0.751                      | -1.383                      | -0.653 | -12.824  | ---       |
| L None          | 1.910                      | 1.834                       | -0.243 | -7.665   | -11.062   |
| RNN             | 1.395                      | 0.053                       | 0.221  | -5.130   | -15.983   |
| L RNN           | <b>2.189<sup>(8)</sup></b> | 1.747                       | -0.087 | -4.001   | -5.807    |
| 2xRNN           | 1.832                      | 1.830                       | 0.448  | -6.162   | -9.095    |
| L 2xRNN         | <b>2.240<sup>(6)</sup></b> | <b>2.432<sup>(3)</sup></b>  | 0.264  | -3.956   | -5.125    |
| 4xAdd+Re        | 1.106                      | 1.430                       | 0.420  | -0.021   | -0.492    |
| L 4xAdd+Re      | 2.043                      | 1.979                       | 0.909  | 0.365    | -0.088    |
| 4xSRNN+Re       | 1.178                      | 1.428                       | 0.187  | -0.029   | -0.212    |
| L 4xSRNN+Re     | <b>2.089<sup>(9)</sup></b> | <b>2.061<sup>(10)</sup></b> | 0.611  | 0.754    | 0.593     |
| RNN+4xAdd+Re    | 1.962                      | <b>2.226<sup>(7)</sup></b>  | 0.857  | 0.081    | 0.086     |
| L RNN+4xAdd+Re  | <b>2.389<sup>(4)</sup></b> | <b>2.672<sup>(1)</sup></b>  | 0.852  | 0.450    | 0.251     |
| RNN+4xSRNN+Re   | 1.599                      | 1.545                       | 0.510  | 0.182    | 0.369     |
| L RNN+4xSRNN+Re | <b>2.297<sup>(5)</sup></b> | <b>2.443<sup>(2)</sup></b>  | 0.804  | 0.600    | 0.480     |

Table 7. Held out test log-likelihood for pendigits dataset. The superscript denotes ranking of log-likelihood on crossvalidation dataset. Note that NADE is TIED conditional with None Transform and NICE is Add+Re Transformation with SingleInd Conditional. In parenthesis is the top-10 picks using validation set.

| Transformation  | LAM                         | RAM                        | TIED   | MultiInd | SingleInd |
|-----------------|-----------------------------|----------------------------|--------|----------|-----------|
| None            | <b>6.923<sup>(1)</sup></b>  | <b>3.911<sup>(8)</sup></b> | 1.437  | -14.138  | ---       |
| L None          | <b>4.104<sup>(9)</sup></b>  | 2.911                      | -2.872 | -9.997   | -15.617   |
| RNN             | <b>5.464<sup>(3)</sup></b>  | 3.273                      | -1.676 | -10.144  | -19.719   |
| L RNN           | <b>4.072<sup>(6)</sup></b>  | 1.398                      | -2.299 | -10.840  | -13.103   |
| 2xRNN           | <b>6.376<sup>(5)</sup></b>  | <b>3.896<sup>(7)</sup></b> | -4.002 | -12.132  | -16.576   |
| L 2xRNN         | 2.987                       | 0.871                      | -3.977 | -10.890  | -12.711   |
| 4xAdd+Re        | -1.924                      | -3.087                     | -3.172 | -5.010   | -6.498    |
| L 4xAdd+Re      | -1.796                      | -1.438                     | -2.288 | -4.951   | -7.834    |
| 4xSRNN+Re       | <b>5.854<sup>(2)</sup></b>  | 2.146                      | -2.827 | -5.970   | -7.084    |
| L 4xSRNN+Re     | 3.758                       | -1.020                     | -3.370 | -5.885   | -12.978   |
| RNN+4xAdd+Re    | -2.357                      | -2.869                     | -2.187 | -5.454   | -8.053    |
| L RNN+4xAdd+Re  | -2.687                      | -2.103                     | -2.185 | -4.742   | -6.941    |
| RNN+4xSRNN+Re   | <b>5.207<sup>(4)</sup></b>  | 2.425                      | -2.126 | -5.147   | -8.859    |
| L RNN+4xSRNN+Re | <b>3.466<sup>(10)</sup></b> | 0.496                      | -2.761 | -7.205   | -13.897   |

**Transformation Autoregressive Networks**

Table 8. Held out test log-likelihood for `susy` dataset. The superscript denotes ranking of log-likelihood on crossvalidation dataset. Note that NADE is TIED conditional with None Transform and NICE is Add+Re Transformation with SingleInd Conditional. In parenthesis is the top-10 picks using validation set.

| <b>Transformation</b> | <b>LAM</b>                  | <b>RAM</b>                   | <b>TIED</b> | <b>MultiInd</b> | <b>SingleInd</b> |
|-----------------------|-----------------------------|------------------------------|-------------|-----------------|------------------|
| None                  | 9.736                       | -14.821                      | -5.721      | -21.369         | ---              |
| L None                | 15.731                      | <b>16.930<sup>(8)</sup></b>  | 6.410       | -8.846          | -17.130          |
| RNN                   | 12.784                      | 3.347                        | 6.114       | -18.575         | -44.273          |
| L RNN                 | 16.381                      | <b>18.389<sup>(2)</sup></b>  | 6.772       | -5.744          | -11.489          |
| 2xRNN                 | 11.052                      | 14.362                       | 3.595       | -16.478         | -33.126          |
| L 2xRNN               | 14.523                      | <b>17.373<sup>(7)</sup></b>  | 10.687      | -6.884          | -10.420          |
| 4xAdd+Re              | 9.835                       | 8.033                        | 7.238       | 6.031           | 4.245            |
| L 4xAdd+Re            | <b>17.673<sup>(3)</sup></b> | <b>16.500<sup>(10)</sup></b> | 11.613      | 10.941          | 9.034            |
| 4xSRNN+Re             | 8.798                       | 13.235                       | 1.234       | 6.936           | 3.378            |
| L 4xSRNN+Re           | 14.242                      | <b>17.870<sup>(5)</sup></b>  | 15.397      | 12.161          | 13.413           |
| RNN+4xAdd+Re          | 15.408                      | 12.480                       | 9.409       | 7.619           | 5.446            |
| L RNN+4xAdd+Re        | <b>17.474<sup>(6)</sup></b> | 16.376                       | 13.765      | 10.951          | 8.269            |
| RNN+4xSRNN+Re         | 14.066                      | <b>17.691<sup>(4)</sup></b>  | 9.136       | 10.088          | 7.656            |
| L RNN+4xSRNN+Re       | <b>16.627<sup>(9)</sup></b> | <b>18.941<sup>(1)</sup></b>  | 13.469      | 12.105          | 12.349           |

Table 9. Held out test log-likelihood for `higgs` dataset. The superscript denotes ranking of log-likelihood on crossvalidation dataset. Note that NADE is TIED conditional with None Transform and NICE is Add+Re Transformation with SingleInd Conditional. In parenthesis is the top-10 picks using validation set.

| <b>Transformation</b> | <b>LAM</b>                   | <b>RAM</b>                  | <b>TIED</b> | <b>MultiInd</b> | <b>SingleInd</b> |
|-----------------------|------------------------------|-----------------------------|-------------|-----------------|------------------|
| None                  | -6.220                       | -5.848                      | -13.883     | -25.793         | ---              |
| L None                | <b>-3.798<sup>(8)</sup></b>  | -10.651                     | -9.084      | -16.025         | -36.051          |
| RNN                   | -5.800                       | <b>-2.600<sup>(3)</sup></b> | -10.797     | -25.760         | -66.223          |
| L RNN                 | <b>-3.975<sup>(9)</sup></b>  | <b>-0.340<sup>(1)</sup></b> | -8.574      | -18.607         | -32.753          |
| 2xRNN                 | -6.456                       | -4.833                      | -9.192      | -25.398         | -60.040          |
| L 2xRNN               | -5.866                       | <b>-3.222<sup>(5)</sup></b> | -8.216      | -16.083         | -30.730          |
| 4xAdd+Re              | -6.502                       | -10.491                     | -9.356      | -13.678         | -15.138          |
| L 4xAdd+Re            | -5.377                       | -5.611                      | -8.006      | -12.106         | -14.129          |
| 4xSRNN+Re             | -7.422                       | -6.863                      | -11.033     | -11.878         | -12.182          |
| L 4xSRNN+Re           | -5.999                       | -9.329                      | -8.474      | -8.223          | -8.926           |
| RNN+4xAdd+Re          | <b>-4.242<sup>(10)</sup></b> | -4.804                      | -9.187      | -12.321         | -15.261          |
| L RNN+4xAdd+Re        | <b>-3.396<sup>(6)</sup></b>  | <b>-3.049<sup>(4)</sup></b> | -8.052      | -12.246         | -13.765          |
| RNN+4xSRNN+Re         | -5.262                       | <b>-2.116<sup>(2)</sup></b> | -10.105     | -12.307         | -9.388           |
| L RNN+4xSRNN+Re       | <b>-3.756<sup>(7)</sup></b>  | -4.773                      | -8.097      | -9.378          | -7.721           |

**Transformation Autoregressive Networks**

Table 10. Held out test log-likelihood for `hepmass` dataset. The superscript denotes ranking of log-likelihood on crossvalidation dataset. Note that NADE is TIED conditional with None Transform and NICE is Add+Re Transformation with SingleInd Conditional. In parenthesis is the top-10 picks using validation set.

| <b>Transformation</b> | <b>LAM</b>                  | <b>RAM</b>                 | <b>TIED</b> | <b>MultiInd</b> | <b>SingleInd</b> |
|-----------------------|-----------------------------|----------------------------|-------------|-----------------|------------------|
| None                  | 2.328                       | <b>3.710<sup>(6)</sup></b> | -4.948      | -19.771         | ---              |
| L None                | <b>3.570<sup>(7)</sup></b>  | 2.517                      | -4.052      | -9.266          | -35.042          |
| RNN                   | 2.088                       | <b>4.935<sup>(1)</sup></b> | -1.639      | -19.851         | -47.686          |
| L RNN                 | <b>2.869<sup>(10)</sup></b> | <b>5.047<sup>(2)</sup></b> | -2.920      | -16.032         | -30.210          |
| 2xRNN                 | 1.774                       | 0.902                      | -1.909      | -15.440         | -36.754          |
| L 2xRNN               | 2.053                       | <b>3.680<sup>(5)</sup></b> | -2.150      | -15.457         | -24.079          |
| 4xAdd+Re              | 1.678                       | 1.873                      | -4.046      | -9.117          | -11.387          |
| L 4xAdd+Re            | 1.961                       | 2.543                      | -2.259      | -6.907          | -9.275           |
| 4xSRNN+Re             | 1.443                       | 2.156                      | -2.904      | -6.091          | -7.186           |
| L 4xSRNN+Re           | 2.072                       | 2.730                      | -3.014      | -5.747          | -6.245           |
| RNN+4xAdd+Re          | 2.817                       | 0.912                      | -2.514      | -6.003          | -9.284           |
| L RNN+4xAdd+Re        | <b>3.906<sup>(3)</sup></b>  | -1.869                     | -3.847      | -6.339          | -9.103           |
| RNN+4xSRNN+Re         | 2.663                       | <b>3.586<sup>(8)</sup></b> | -0.863      | -7.146          | -3.939           |
| L RNN+4xSRNN+Re       | <b>3.759<sup>(4)</sup></b>  | <b>3.487<sup>(9)</sup></b> | -0.239      | -7.522          | -6.102           |

Table 11. Held out test log-likelihood for `satimage2` dataset. The superscript denotes ranking of log-likelihood on crossvalidation dataset. Note that NADE is TIED conditional with None Transform and NICE is Add+Re Transformation with SingleInd Conditional. In parenthesis is the top-10 picks using validation set.

| <b>Transformation</b> | <b>LAM</b>                  | <b>RAM</b>                  | <b>TIED</b> | <b>MultiInd</b>             | <b>SingleInd</b>             |
|-----------------------|-----------------------------|-----------------------------|-------------|-----------------------------|------------------------------|
| None                  | <b>-1.716<sup>(9)</sup></b> | <b>-1.257<sup>(3)</sup></b> | -9.296      | -50.507                     | ---                          |
| L None                | -20.164                     | <b>-1.079<sup>(4)</sup></b> | -2.635      | <b>-1.570<sup>(5)</sup></b> | -5.972                       |
| RNN                   | -7.728                      | -4.949                      | -5.466      | -6.047                      | -16.521                      |
| L RNN                 | -31.296                     | <b>-0.773<sup>(2)</sup></b> | -3.944      | <b>-1.824<sup>(8)</sup></b> | -2.977                       |
| 2xRNN                 | -12.283                     | <b>-2.193<sup>(7)</sup></b> | -2.137      | -5.447                      | -8.075                       |
| L 2xRNN               | -20.968                     | <b>-0.550<sup>(1)</sup></b> | -5.140      | <b>-1.699<sup>(6)</sup></b> | <b>-2.276<sup>(10)</sup></b> |
| 4xAdd+Re              | -19.931                     | -7.539                      | -11.826     | -18.901                     | -17.977                      |
| L 4xAdd+Re            | -21.128                     | -9.944                      | -12.336     | -21.677                     | -24.070                      |
| 4xSRNN+Re             | -7.519                      | -11.368                     | -2.549      | -7.730                      | -7.232                       |
| L 4xSRNN+Re           | -18.170                     | -7.709                      | -5.533      | -17.085                     | -15.347                      |
| RNN+4xAdd+Re          | -19.278                     | -11.789                     | -12.837     | -21.249                     | -22.786                      |
| L RNN+4xAdd+Re        | -20.899                     | -12.949                     | -12.867     | -26.164                     | -28.302                      |
| RNN+4xSRNN+Re         | -13.476                     | -3.951                      | -6.284      | -15.025                     | -16.443                      |
| L RNN+4xSRNN+Re       | -20.179                     | -12.128                     | -7.258      | -18.065                     | -18.125                      |

Table 12. Held out test log-likelihood for `music` dataset. The superscript denotes ranking of log-likelihood on crossvalidation dataset. Note that NADE is TIED conditional with None Transform and NICE is Add+Re Transformation with SingleInd Conditional. In parenthesis is the top-10 picks using validation set.

| Transformation  | LAM                           | RAM     | TIED    | MultiInd | SingleInd |
|-----------------|-------------------------------|---------|---------|----------|-----------|
| None            | -57.873                       | -97.925 | -98.047 | -113.099 | ---       |
| L None          | <b>-52.954<sup>(4)</sup></b>  | -74.220 | -72.441 | -82.866  | -104.287  |
| RNN             | <b>-54.933<sup>(10)</sup></b> | -80.436 | -74.361 | -106.219 | -144.735  |
| L RNN           | <b>-52.710<sup>(3)</sup></b>  | -59.815 | -66.536 | -82.731  | -98.813   |
| 2xRNN           | -56.958                       | -85.359 | -77.456 | -104.440 | -133.898  |
| L 2xRNN         | <b>-53.956<sup>(8)</sup></b>  | -57.611 | -65.016 | -82.678  | -96.542   |
| 4xAdd+Re        | -56.349                       | -69.302 | -67.064 | -73.886  | -83.524   |
| L 4xAdd+Re      | <b>-53.169<sup>(5)</sup></b>  | -59.282 | -59.093 | -69.887  | -79.330   |
| 4xSRNN+Re       | -57.670                       | -68.116 | -74.006 | -78.032  | -121.197  |
| L 4xSRNN+Re     | <b>-53.879<sup>(7)</sup></b>  | -55.665 | -63.894 | -77.564  | -81.188   |
| RNN+4xAdd+Re    | <b>-53.177<sup>(6)</sup></b>  | -67.377 | -63.372 | -73.882  | -84.032   |
| L RNN+4xAdd+Re  | <b>-51.572<sup>(1)</sup></b>  | -56.190 | -58.885 | -69.484  | -79.555   |
| RNN+4xSRNN+Re   | <b>-54.065<sup>(9)</sup></b>  | -61.204 | -76.437 | -71.814  | -81.087   |
| L RNN+4xSRNN+Re | <b>-52.617<sup>(2)</sup></b>  | -68.756 | -65.061 | -83.292  | -78.997   |

Table 13. Held out test log-likelihood for `wordvecs` dataset. The superscript denotes ranking of log-likelihood on validation dataset. Due to time constraints only models with linear transformations were trained.

| Transformation  | LAM                           | RAM                           | TIED                           | MultiInd | SingleInd |
|-----------------|-------------------------------|-------------------------------|--------------------------------|----------|-----------|
| L None          | <b>-252.659<sup>(6)</sup></b> | -279.788                      | -278.789                       | -332.474 | -387.341  |
| L RNN           | <b>-252.894<sup>(7)</sup></b> | -278.795                      | -278.663                       | -332.689 | -386.700  |
| L 2xRNN         | <b>-250.285<sup>(4)</sup></b> | -275.508                      | -277.848                       | -333.234 | -386.649  |
| L 4xAdd+Re      | <b>-247.440<sup>(1)</sup></b> | <b>-272.371<sup>(8)</sup></b> | -274.205                       | -331.148 | -374.563  |
| L 4xSRNN+Re     | <b>-248.393<sup>(2)</sup></b> | -300.666                      | <b>-273.372<sup>(9)</sup></b>  | -308.735 | 0.000     |
| L RNN+4xAdd+Re  | <b>-249.980<sup>(3)</sup></b> | -280.938                      | <b>-273.976<sup>(10)</sup></b> | -331.316 | -380.031  |
| L RNN+4xSRNN+Re | <b>-251.468<sup>(5)</sup></b> | -280.325                      | -274.082                       | -308.148 | -395.084  |
